# Supplementary material for: Colorimetric and ratiometric fluorescence sensing of water based on 9-methyl pyrido[3,4-b]indole-boron trifluoride complex
Source: Royal Society of Chemistry journal article supplement (doi:10.1039/c8dt04527e), 2019-01-01
Supplement: c8dt04527e1.pdf [file c8dt04527e1.pdf]

## Supplementary Information

### **Colorimetric and ratiometric fluorescence sensing of water based on 9-methyl pyrido[3,4-*b*]indole-boron trifluoride complex**

Toshiaki Enoki and Yousuke Ooyama\*

*Department of Applied Chemistry, Graduate School of Engineering, Hiroshima University,  
Higashi-Hiroshima, 739-8527, Japan.*

*Fax: +81 824 24 5494; Tel: +81 824 24 7689; E-mail:yooyama@hiroshima-u.ac.jp*

(a)

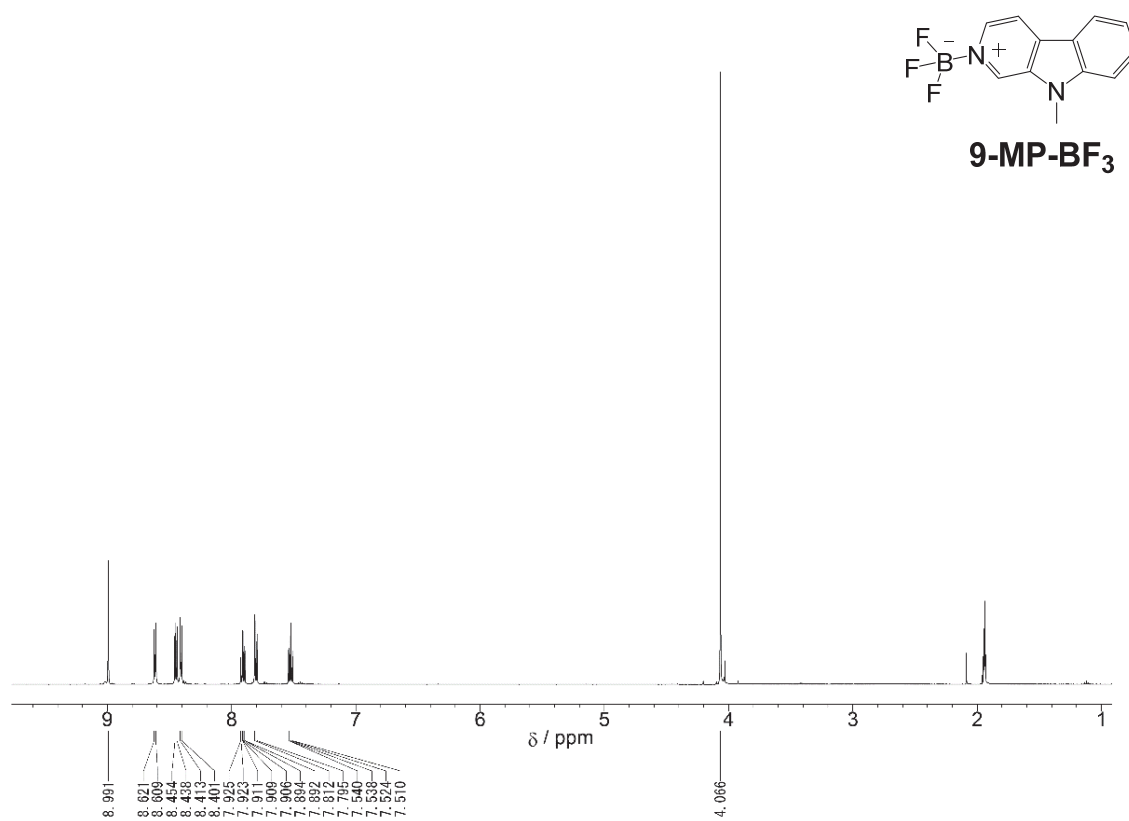

(b)

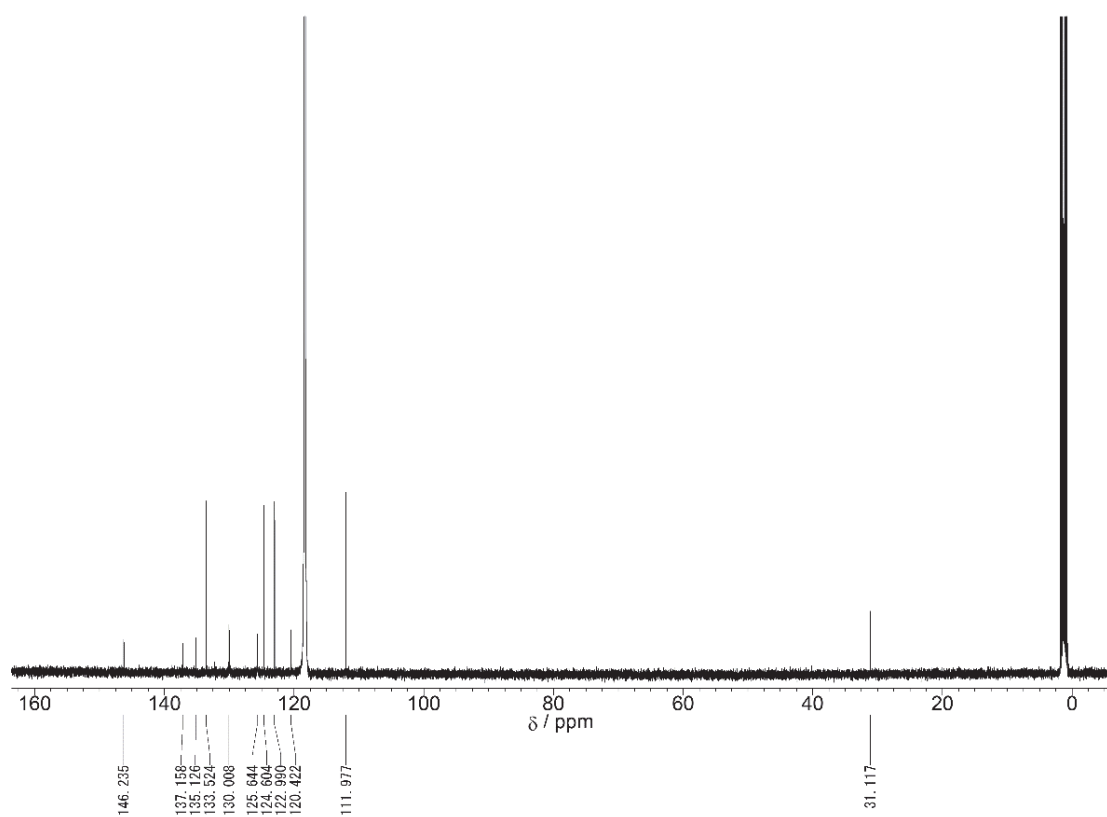

**Fig. S1** (a) <sup>1</sup>H HMR (500 MHz) and (b) <sup>13</sup>C HMR (125 MHz) spectra of **9-MP-BF<sub>3</sub>** in acetonitrile-d<sub>3</sub>.

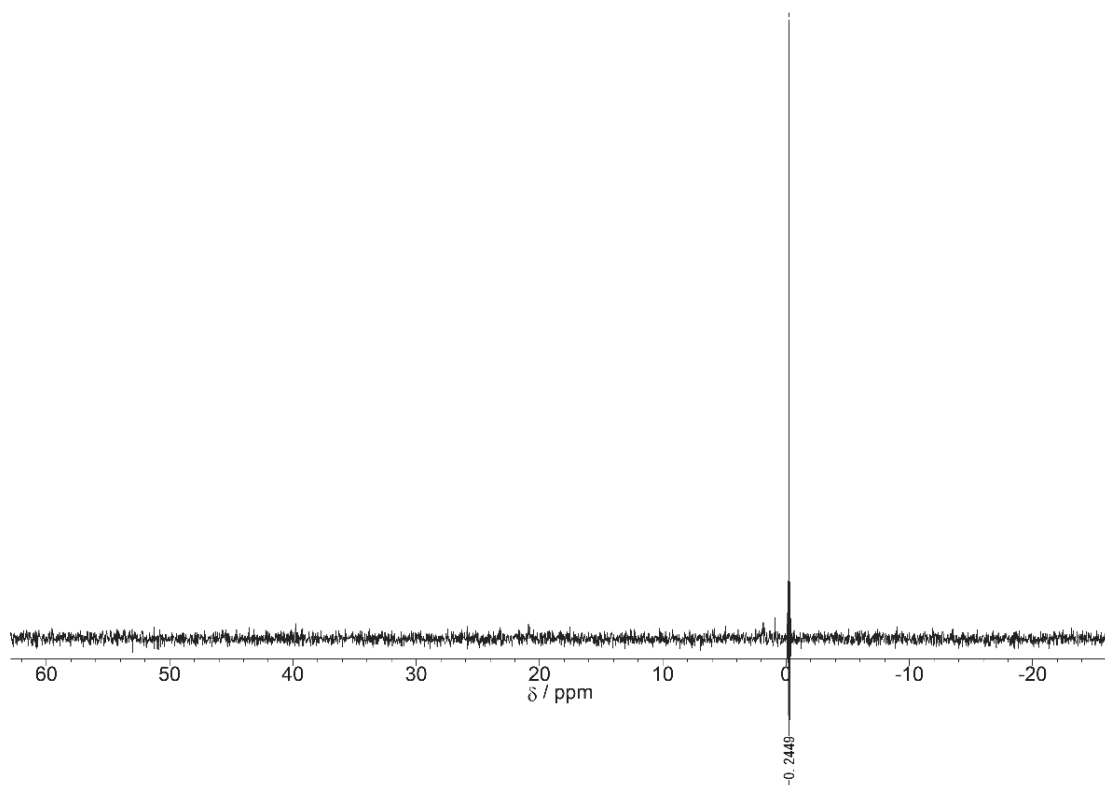

**Fig. S2**  $^{11}\text{B}$  HMR (160 MHz) spectra of **9-MP-BF<sub>3</sub>** in acetonitrile- $\text{d}_3$ .

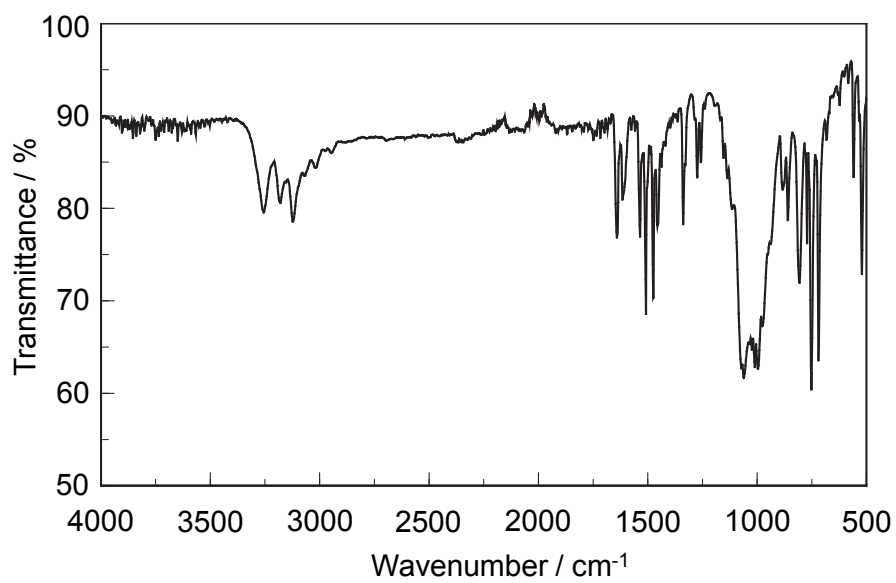

**Fig. S3** FTIR spectrum of **9-MP-BF<sub>3</sub>**.

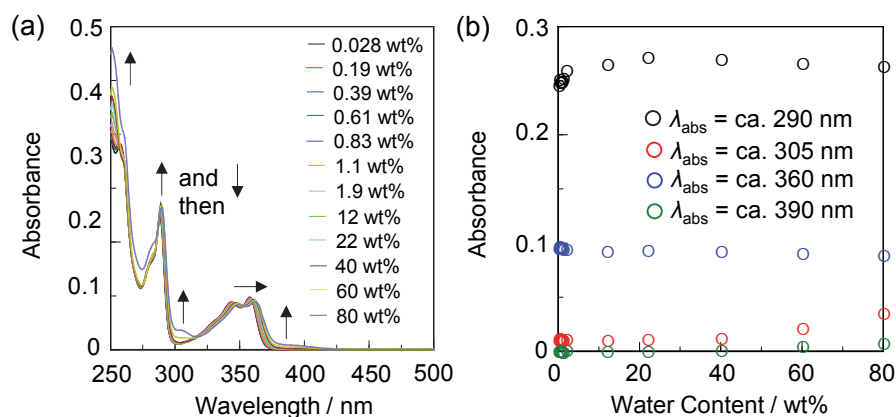

**Fig. S4** (a) Photoabsorption spectra of **9-MP** ( $c = 2.0 \times 10^{-5} \text{ M}$ ) in acetonitrile containing water (0.028–80 wt%). (b) Absorbance at 290 nm, 305 nm, 360 nm and 390 nm of **9-MP** as a function of water content from 0.028 wt% to 80 wt% in acetonitrile.

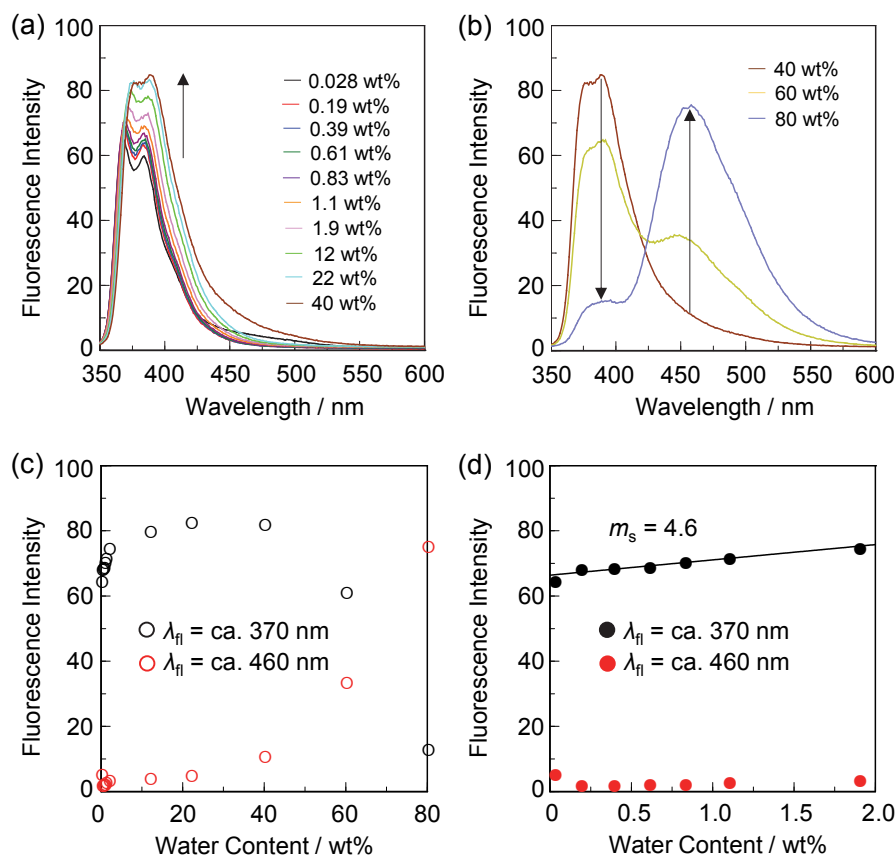

**Fig. S5** Fluorescence spectra of **9-MP** ( $c = 2.0 \times 10^{-5} \text{ M}$ ) by photoexcitation at 323 nm in acetonitrile containing water content of (a) 0.028–40 wt% and (b) 40–80 wt%. Fluorescence peak intensity at 370 nm and 460 nm of **9-MP** by photoexcitation at 323 nm as a function of water content from (c) 0.028 wt% to 80 wt% and (d) 0.028 wt% to 1.9 wt% in acetonitrile.
